# Supplementary material for: A Population-Based Cross-Sectional Investigation of COVID-19 Hospitalizations and Mortality Among Autistic People
Source: bioRxiv or medRxiv preprint supplement (doi:10.1101/2024.02.23.24303274), 2024-02-24
Supplement: Supplementary file [file media-1.pdf]

## Supplementary Material

Percentage of the population to have a diagnosis of the 35 most common conditions in the UK. For the autistic population, both unadjusted and age-adjusted values are given.

|                                            | Whole population                       |                                      |         |            |         | Positive COVID-19 test                |                                  |         |            |         |
|--------------------------------------------|----------------------------------------|--------------------------------------|---------|------------|---------|---------------------------------------|----------------------------------|---------|------------|---------|
|                                            | General population<br>(n = 48,383,130) | Autistic population<br>(n = 180,860) |         |            |         | General population<br>(n = 8,422,375) | Autistic population (n = 32,375) |         |            |         |
|                                            |                                        | Adjusted                             | P-value | Unadjusted | P-value |                                       | Adjusted                         | P-value | Unadjusted | P-value |
| Alcohol problems                           | 4.0                                    | 6.4                                  | <0.001  | 3.5        | <0.001  | 5.2                                   | 7.7                              | <0.001  | 4.6        | <0.001  |
| Anorexia or bulimia                        | 0.2                                    | 0.5                                  | <0.001  | 0.5        | <0.001  | 0.3                                   | 1.0                              | <0.001  | 0.9        | <0.001  |
| Anxiety & other neurotic                   | 4.9                                    | 12.6                                 | <0.001  | 9.3        | <0.001  | 7.5                                   | 17.3                             | <0.001  | 12.3       | <0.001  |
| Asthma (currently treated)                 | 4.3                                    | 6.5                                  | <0.001  | 5.0        | <0.001  | 5.7                                   | 9.9                              | <0.001  | 6.6        | <0.001  |
| Atrial fibrillation                        | 2.8                                    | 4.7                                  | <0.001  | 0.7        | <0.001  | 3.5                                   | 4.8                              | <0.001  | 1.0        | <0.001  |
| Blindness and low vision                   | 0.8                                    | 1.5                                  | <0.001  | 0.4        | <0.001  | 1.1                                   | 1.5                              | .02     | 0.7        | <0.001  |
| Bronchiectasis                             | 0.2                                    | 0.3                                  | .02     | 0.1        | <0.001  | 0.3                                   | 0.3                              | .10     | 0.1        | <0.001  |
| Cancer - [New]Diagnosis in last five years | 8.9                                    | 8.6                                  | <0.001  | 3.5        | <0.001  | 12.2                                  | 10.3                             | <0.001  | 4.4        | <0.001  |

|                                           |     |      |        |      |        |      |      |        |      |        |
|-------------------------------------------|-----|------|--------|------|--------|------|------|--------|------|--------|
| Coronary heart disease                    | 3.6 | 6.5  | <0.001 | 1.1  | <0.001 | 4.9  | 7.6  | <0.001 | 1.7  | <0.001 |
| Chronic kidney disease                    | 0.1 | 0.2  | .002   | 0.1  | .001   | 0.1  | 0.2  | .11    | 0.1  | .23    |
| Chronic Liver Disease and Viral Hepatitis | 4.7 | 8.8  | <0.001 | 3.4  | <0.001 | 6.2  | 10.2 | <0.001 | 4.9  | <0.001 |
| COPD                                      | 2.9 | 4.5  | <0.001 | 0.8  | <0.001 | 2.9  | 4.2  | <0.001 | 1.0  | <0.001 |
| Dementia                                  | 3.9 | 10.0 | <0.001 | 4.8  | <0.001 | 5.6  | 13.6 | <0.001 | 6.8  | <0.001 |
| Depression                                | 4.6 | 14.0 | <0.001 | 12.5 | <0.001 | 6.6  | 18.6 | <0.001 | 14.6 | <0.001 |
| Diabetes                                  | 9.8 | 15.4 | <0.001 | 4.1  | <0.001 | 11.0 | 16.6 | <0.001 | 5.0  | <0.001 |
| Diverticular disease of intestine         | 3.0 | 6.3  | <0.001 | 2.1  | <0.001 | 4.3  | 8.1  | <0.001 | 3.1  | <0.001 |
| Epilepsy (currently treated)              | 1.6 | 5.5  | <0.001 | 1.7  | .01    | 2.7  | 7.3  | <0.001 | 2.2  | <0.001 |
| Heart failure                             | 5.2 | 8.5  | <0.001 | 1.3  | <0.001 | 6.8  | 9.7  | <0.001 | 2.0  | <0.001 |
| Hearing loss                              | 0.9 | 2.1  | <0.001 | 0.4  | <0.001 | 1.2  | 2.4  | <0.001 | 0.6  | <0.001 |
| Hypertension                              | 8.0 | 11.6 | <0.001 | 2.3  | <0.001 | 9.1  | 12.5 | <0.001 | 3.0  | <0.001 |
| Inflammatory bowel disease                | 1.4 | 2.8  | <0.001 | 1.1  | <0.001 | 2.1  | 3.9  | <0.001 | 1.7  | <0.001 |
| Irritable bowel syndrome                  | 0.9 | 1.9  | <0.001 | 0.8  | .001   | 1.2  | 2.6  | <0.001 | 1.2  | .45    |
| Migraine                                  | 0.7 | 1.3  | <0.001 | 0.5  | <0.001 | 1.0  | 1.6  | <0.001 | 0.8  | <0.001 |
| Multiple sclerosis                        | 0.1 | 0.1  | .60    | 0.1  | .001   | 0.1  | 0.2  | .20    | 0.1  | .57    |
| Peptic Ulcer Disease                      | 1.4 | 2.8  | <0.001 | 0.9  | <0.001 | 1.9  | 3.6  | <0.001 | 1.4  | <0.001 |

|                                                                       |     |      |        |      |        |     |      |        |      |        |
|-----------------------------------------------------------------------|-----|------|--------|------|--------|-----|------|--------|------|--------|
| Parkinson's disease                                                   | 0.3 | 1.1  | <0.001 | 0.1  | <0.001 | 0.4 | 1.2  | <0.001 | 0.2  | <0.001 |
| Prostate disorders                                                    | 0.8 | 2.3  | <0.001 | 0.4  | <0.001 | 1.1 | 2.8  | <0.001 | 0.6  | <0.001 |
| Psychoactive substance misuse (not alcohol)                           | 5.9 | 12.5 | <0.001 | 6.6  | <0.001 | 7.4 | 15.7 | <0.001 | 9.1  | <0.001 |
| Psoriasis or eczema                                                   | 0.6 | 1.4  | <0.001 | 0.5  | <0.001 | 1.0 | 2.1  | <0.001 | 0.7  | <0.001 |
| Peripheral vascular disease                                           | 1.5 | 2.8  | <0.001 | 0.5  | <0.001 | 2.0 | 3.4  | <0.001 | 0.7  | <0.001 |
| Rheumatoid arthritis                                                  | 2.4 | 3.7  | <0.001 | 1.4  | <0.001 | 3.3 | 4.9  | <0.001 | 1.9  | <0.001 |
| Schizophrenia (and related non-organic psychosis) or bipolar disorder | 4.0 | 22.5 | <0.001 | 16.1 | <0.001 | 5.9 | 29.6 | <0.001 | 20.2 | <0.001 |
| Chronic sinusitis                                                     | 0.2 | 0.3  | <0.001 | 0.2  | .69    | 0.2 | 0.3  | <0.001 | 0.2  | .68    |
| Stroke & transient ischaemic attack                                   | 4.2 | 9.8  | <0.001 | 4.3  | .32    | 6.1 | 13.4 | <0.001 | 6.3  | .08    |
| Thyroid disorders                                                     | 1.5 | 2.5  | <0.001 | 0.8  | <0.001 | 1.9 | 2.8  | <0.001 | 1.0  | <0.001 |
